# Supplementary material for: Characterization of a Novel Ourmia-Like Mycovirus Infecting Magnaporthe oryzae and Implications for Viral Diversity and Evolution
Source: PubMed Central journal article supplement (PMC6465991; doi:10.3390/v11030223), 2019-03-05
Supplement: viruses-11-00223-s001.pdf [file viruses-11-00223-s001.pdf]

**Table S1:** MOLV4-like sequences obtained from the NCBI TSA, EST,GSS and WGS database.

| Database | Organism               | Contig or accession no.                        | Length (bp) | Best BLASTX hit                              | Accession no.  | Identity(%)  | E value | Query cover |
|----------|------------------------|------------------------------------------------|-------------|----------------------------------------------|----------------|--------------|---------|-------------|
| EST      | Magnaporthe grisea     | DC974923                                       | 1417        | Pyricularia oryzae ourmia-like virus 2       | BBF90577.1     | 202/235(86%) | 6e-126  | 69          |
|          | Magnaporthe grisea     | Contig                                         | 2136        | Pyricularia oryzae ourmia-like virus 3       | BBF90578.1     | 209/422(50%) | 2e-129  | 85          |
|          | Botrytis tulipae       | Contig-1                                       | 1984        | Combu positive-strand RNA mycovirus          | QAB47442.1     | 122/360(34%) | 2e-43   | 53          |
|          | Botrytis tulipae       | Contig-2                                       | 1791        | Penicillium citrinum ourmia-like virus 1     | AYP71797.1     | 213/480(44%) | 1e-101  | 79          |
|          | Botryotinia fuckeliana | Contig                                         | 1466        | Pyricularia oryzae ourmia-like virus 1       | BBF90576.1     | 214/469(46%) | 8e-115  | 94          |
|          | Blumeria graminis      | Contig-1                                       | 2459        | Phomopsis longicolla RNA virus 1             | YP_009345044.1 | 82/193(42%)  | 4e-72   | 64          |
| TSA      | Blumeria graminis      | Contig-2                                       | 1497        | Sclerotinia sclerotiorum ourmia-like virus 2 | ALD89139.1     | 166/352(47%) | 5e-86   | 68          |
|          | Agrostis stolonifera   | Agrostis_stolonifera_c273710_g1_i1             | 203         | Pyricularia oryzae ourmia-like virus 1       | BBF90576.1     | 37/66(56%)   | 5e-15   | 97          |
|          | Araucaria cunninghamii | Araucaria_cunninghamii_Ref_Hoop_Pine           | 224         | Aspergillus neoniger ourmia-like virus 1     | AZT88620.1     | 36/74(49%)   | 7e-14   | 97          |
|          | Araucaria cunninghamii | Araucaria_cunninghamii_Ref_Hoop_Pine_          | 538         | Aspergillus neoniger ourmia-like virus 1     | AZT88620.1     | 105/179(59%) | 2e-61   | 99          |
|          | Chionochloa macra      | Chionochloa_macra_c33164_g1_i1                 | 2534        | Aspergillus neoniger ourmia-like virus 1     | AZT88620.1     | 276/660(42%) | 8e-130  | 73          |
|          | Chionochloa macra      | Chionochloa_macra_c140575_g1_i1                | 2156        | Pyricularia oryzae ourmia-like virus 2       | BBF90577.1     | 168/350(48%) | 2e-88   | 48          |
|          | Chionochloa macra      | Chionochloa_macra_c327464_g1_i2                | 2486        | Magnaporthe oryzae ourmia-like virus         | SBQ28480.1     | 213/594(36%) | 3e-72   | 70          |
|          | Chionochloa macra      | Chionochloa_macra_c429594_g1_i1                | 873         | Magnaporthe oryzae ourmia-like virus         | SBQ28480.1     | 142/293(48%) | 6e-70   | 100         |
|          | Cyathus bulleri        | Cyathus_bulleri_Transcript_6240                | 3685        | Agaricus bisporus virus 14                   | AQM49944.1     | 213/696(31%) | 5e-84   | 54          |
|          | Dactylorhiza fuchsii   | Dactylorhiza_fuchsii_fB1855_comp168297_c0_seq1 | 1726        | Combu positive-strand RNA mycovirus          | QAB47442.1     | 112/284(39%) | 2e-36   | 47          |
|          | Datisca glomerata      | Datisca_glomerata_c22499_g1_i1                 | 1324        | Pyricularia oryzae ourmia-like virus 2       | BBF90577.1     | 200/353(57%) | 8e-118  | 77          |
|          | Helianthus niveus      | Helianthus niveus                              | 1995        | Sclerotinia sclerotiorum ourmia-like virus 2 | ALD89139.1     | 174/376(46%) | 2e-79   | 53          |

| Sampletranscript17436       |                                                               |      |                                          |            |              |        |    |  |
|-----------------------------|---------------------------------------------------------------|------|------------------------------------------|------------|--------------|--------|----|--|
| Humulus lupulus             | Humulus lupulus var. lupulus mRNA, contig: comp80462_c0_seq1  | 846  | Aspergillus neoniger ourmia-like virus 1 | AZT88620.1 | 160/289(55%) | 3e-89  | 99 |  |
| Humulus lupulus             | Humulus lupulus var. lupulus mRNA, contig: comp268420_c0_seq1 | 893  | Aspergillus neoniger ourmia-like virus 1 | AZT88620.1 | 166/298(56%) | 2e-95  | 97 |  |
| Humulus lupulus             | Humulus lupulus var. lupulus mRNA, contig: comp278983_c0_seq1 | 397  | Pyricularia oryzae ourmia-like virus 1   | BBF90576.1 | 76/132(58%)  | 3e-43  | 99 |  |
| Humulus lupulus             | Humulus lupulus var. lupulus mRNA, contig: comp293919_c0_seq1 | 2572 | Aspergillus neoniger ourmia-like virus 1 | AZT88620.1 | 244/516(47%) | 2e-130 | 59 |  |
| Humulus lupulus             | Humulus lupulus var. lupulus mRNA, contig: comp296725_c0_seq6 | 2652 | Aspergillus neoniger ourmia-like virus 1 | AZT88620.1 | 240/505(48%) | 1e-138 | 55 |  |
| Ixodes scapularis           | Ixodes scapularis Isca_Trinity_c595567_g1_i1, c67321_g2_i1    | 637  | Aspergillus neoniger ourmia-like virus 1 | AZT88620.1 | 111/210(53%) | 2e-68  | 97 |  |
| Ixodes scapularis Isca      | Ixodes scapularis Isca_Trinity_c444166_g1_i1                  | 263  | Aspergillus neoniger ourmia-like virus 1 | AZT88620.1 | 40/90(44%)   | 3e-13  | 99 |  |
| Leucocoprinus               | Leucocoprinus comp14711_c0_seq1                               | 2094 | Magnaporthe oryzae ourmia-like virus     | SBQ28480.1 | 124/363(34%) | 1e-37  | 51 |  |
| Leucocoprinus gongylophorus | Leucocoprinus gongylophorus, isolate Ae322                    | 2131 | Magnaporthe oryzae ourmia-like virus     | SBQ28480.1 | 122/363(34%) | 1e-38  | 50 |  |
| Leucocoprinus sp.           | Leucocoprinus sp. HH-2015b comp12727_c0_seq1                  | 1704 | Magnaporthe oryzae ourmia-like virus     | SBQ28480.1 | 124/383(32%) | 9e-37  | 41 |  |
| Leucocoprinus sp.           | Leucocoprinus sp. HH-2015b comp13907_c0_seq1                  | 2454 | Magnaporthe oryzae ourmia-like virus     | SBQ28480.1 | 124/383(32%) | 2e-29  | 46 |  |

|                         |                                                  |      |                                                       |            |              |        |    |
|-------------------------|--------------------------------------------------|------|-------------------------------------------------------|------------|--------------|--------|----|
| Leucocoprinus sp.       | Leucocoprinus sp. HH-2015b<br>comp15750_c0_seq1  | 2626 | Magnaporthe oryzae ourmia-like virus                  | SBQ28480.1 | 93/226(41%)  | 7e-37  | 25 |
| Monilinia fructicola    | Monilinia fructicola<br>MFRC_TR_DN6274_c0_g2_i1  | 2455 | Combu positive-strand RNA mycovirus                   | QAB47442.1 | 249/516(48%) | 5e-129 | 62 |
| Monilinia fructicola    | Monilinia fructicola<br>MFRC_TR_DN9539_c0_g1_i1  | 2827 | Penicillium citrinum ourmia-like virus 1              | AYP71797.1 | 189/488(39%) | 1e-63  | 50 |
| Monilinia fructigena    | Monilinia fructigena<br>MFRG_TR_DN8768_c0_g1_i3  | 3384 | Aspergillus neoniger ourmia-like virus 1              | AZT88620.1 | 228/517(44%) | 2e-104 | 44 |
| Nepenthes khasiana      | Nepenthes khasiana<br>comp133154_c0_seq1_m_24663 | 1329 | Sclerotinia sclerotiorum ourmia-like virus 2<br>RNA 1 | ALD89139.1 | 178/450(40%) | 2e-88  | 96 |
| Ophiocordyceps sinensis | Ophiocordyceps sinensis<br>contig09535           | 1176 | Combu positive-strand RNA mycovirus                   | QAB47442.1 | 109/272(40%) | 2e-40  | 80 |
| Podosphaera xanthii     | Podosphaera xanthii<br>Contig3207                | 2393 | Combu positive-strand RNA mycovirus                   | QAB47442.1 | 139/325(43%) | 6e-63  | 39 |
| Podosphaera xanthii     | Podosphaera xanthii<br>Contig8947                | 2058 | Magnaporthe oryzae ourmia-like virus                  | SBQ28480.1 | 194/493(39%) | 9e-88  | 70 |
| Saccharum               | Saccharum hybrid cultivar<br>r_SUGdenovo-0010839 | 2802 | Penicillium citrinum ourmia-like virus 1              | AYP71797.1 | 246/494(50%) | 4e-140 | 52 |
| Saccharum               | Saccharum hybrid cultivar<br>SUGdenovo-0010839   | 2517 | Penicillium citrinum ourmia-like virus 1              | AYP71797.1 | 189/487(39%) | 1e-85  | 56 |
| Saccharum               | Saccharum hybrid cultivar<br>SUGdenovo-0063813   | 2336 | Pyricularia oryzae ourmia-like virus 2                | BBF90577.1 | 170/347(49%) | 8e-85  | 44 |
| Saccharum               | Saccharum hybrid cultivar<br>SUGdenovo-0201048   | 883  | Soybean leaf-associated ourmiavirus 2                 | ALM62250.1 | 125/238(53%) | 2e-65  | 78 |
| Saccharum               | Saccharum hybrid cultivar<br>SUGdenovo-0298683   | 2102 | Pyricularia oryzae ourmia-like virus 2                | BBF90577.1 | 189/321(59%) | 7e-108 | 45 |
| Saccharum               | Contig                                           | 1517 | [Aspergillus neoniger ourmia-like virus 1             | AZT88620.1 | 261/398(66%) | 4e-170 | 78 |
| Saccharum               | Contig                                           | 1423 | Phomopsis longicolla RNA virus 1                      | YP_0093450 | 267/472(57%) | 8e-170 | 99 |

|                             |                                                               |      |                                          |                    |              |        |    |
|-----------------------------|---------------------------------------------------------------|------|------------------------------------------|--------------------|--------------|--------|----|
| Saccharum                   | Saccharum hybrid cultivar<br>SUGdenovo-0306151                | 603  | Phomopsis longicolla RNA virus 1         | 44.1<br>YP_0093450 | 109/218(50%) | 1e-47  | 98 |
| Saccharum                   | Saccharum hybrid cultivar<br>SUGdenovo-0307163                | 426  | Combu positive-strand RNA mycovirus      | 44.1<br>QAB47442.1 | 83/138(60%)  | 2e-42  | 97 |
| Saccharum                   | Saccharum hybrid cultivar<br>SUGdenovo-0307166                | 943  | Pyricularia oryzae ourmia-like virus 2   | BBF90577.1         | 100/182(55%) | 1e-50  | 55 |
| Saccharum                   | Saccharum hybrid cultivar<br>SUGdenovo-0309206                | 759  | Phomopsis longicolla RNA virus 1         | YP_0093450         | 65/127(51%)  | 3e-25  | 51 |
| Saccharum                   | Saccharum hybrid cultivar<br>r_SUGdenovo-0321797 ,<br>0525616 | 2328 | Combu positive-strand RNA mycovirus      | 44.1<br>QAB47442.1 | 277/628(44%) | 2e-139 | 79 |
| Saccharum                   | Saccharum hybrid cultivar<br>SUGdenovo-0322501                | 2070 | Combu positive-strand RNA mycovirus      | QAB47442.1         | 255/553(46%) | 1e-121 | 79 |
| Saccharum                   | Saccharum hybrid cultivar<br>SUGdenovo-0323827                | 2602 | Aspergillus neoniger ourmia-like virus 1 | AZT88620.1         | 378/701(54%) | 0      | 77 |
| Saccharum                   | Saccharum hybrid cultivar<br>SUGdenovo-0461223                | 2548 | Combu positive-strand RNA mycovirus      | QAB47442.1         | 262/563(47%) | 1e-125 | 47 |
| Saccharum                   | Saccharum hybrid cultivar<br>SUGdenovo-0556108                | 2468 | Penicillium citrinum ourmia-like virus 1 | AYP71797.1         | 196/535(37%) | 6e-76  | 61 |
| Saccharum                   | Saccharum hybrid cultivar<br>SUGdenovo-0580278                | 482  | Combu positive-strand RNA mycovirus      | QAB47442.1         | 83/146(57%)  | 6e-39  | 90 |
| Salix integra               | Salix integra<br>comp92875_c0                                 | 2658 | Penicillium citrinum ourmia-like virus 1 | AYP71797.1         | 207/523(40%) | 7e-91  | 57 |
| Sclerotinia homoeocarpa     | Sclerotinia homoeocarpa<br>7225                               | 820  | Pyricularia oryzae ourmia-like virus 1   | BBF90576.1         | 141/262(54%) | 3e-79  | 95 |
| Sclerotinia homoeocarpa     | Sclerotinia homoeocarpa<br>13583                              | 2841 | Aspergillus neoniger ourmia-like virus 1 | AZT88620.1         | 248/555(45%) | 4e-129 | 57 |
| Sclerotinia homoeocarpa     | Sclerotinia homoeocarpa<br>14589                              | 1454 | Aspergillus neoniger ourmia-like virus 1 | AZT88620.1         | 187/416(45%) | 3e-97  | 83 |
| Sclerotinia homoeocarpa     | Sclerotinia homoeocarpa<br>23242                              | 456  | Pyricularia oryzae ourmia-like virus 1   | BBF90576.1         | 90/151(60%)  | 3e-48  | 99 |
| Suaeda fruticose (Actinidia | Suaeda fruticose (Actinidia                                   | 1374 | Combu positive-strand RNA mycovirus      | QAB47442.1         | 208/468(44%) | 2e-104 | 97 |

|     |                              |                                                 |      |                                              |                |              |        |     |  |  |
|-----|------------------------------|-------------------------------------------------|------|----------------------------------------------|----------------|--------------|--------|-----|--|--|
|     | deliciosa)                   | deliciosa)                                      |      |                                              |                |              |        |     |  |  |
|     | Suaeda fruticosa             | Suaeda fruticosa                                | 779  | Aspergillus neoniger ourmia-like virus 1     | AZT88620.1     | 134/250(54%) | 6e-83  | 93  |  |  |
|     |                              | Locus_57460_Transcript_1/65255                  |      |                                              |                |              |        |     |  |  |
|     | Triticum aestivum            | Triticum aestivum                               | 663  | Phomopsis longicolla RNA virus 1             | YP_009345044.1 | 109/214(51%) | 1e-57  | 95  |  |  |
|     | Triticum aestivum            | Triticum aestivum                               | 1064 | Sclerotinia sclerotiorum ourmia-like virus 2 | ALD89139.1     | 163/340(48%) | 3e-92  | 95  |  |  |
|     | Triticum aestivum            | Triticum aestivum                               | 5552 | Combu positive-strand RNA mycovirus          | QAB47442.1     | 127/361(35%) | 2e-41  | 38  |  |  |
|     | Triticum aestivum            | Triticum aestivum                               | 2474 | Combu positive-strand RNA mycovirus          | QAB47442.1     | 127/359(35%) | 2e-40  | 41  |  |  |
|     | Triticum aestivum            | Triticum aestivum                               | 2480 | Aspergillus neoniger ourmia-like virus 1     | AZT88620.1     | 245/618(40%) | 5e-111 | 69  |  |  |
|     | Loxostege sticticalis        | Loxostege sticticalis                           | 327  | Sclerotinia sclerotiorum ourmia-like virus 1 | ALD89138.1     | 38/96(40%)   | 9e-09  | 84  |  |  |
|     | Loxostege sticticalis        | Loxostege sticticalis                           | 242  | Sclerotinia sclerotiorum ourmia-like virus 1 | ALD89138.1     | 32/75(43%)   | 5e-07  | 88  |  |  |
| WGS | Calonectria naviculata       | Calonectria naviculata                          | 657  | Combu positive-strand RNA mycovirus          | QAB47442.1     | 94/225(42%)  | 2e-38  | 100 |  |  |
|     |                              | strain CBS 101121 contig_50                     |      |                                              |                |              |        |     |  |  |
|     | Calonectria leucothoes       | Calonectria leucothoes                          | 576  | Penicillium citrinum ourmia-like virus 1     | AYP71797.1     | 107/195(55%) | 7e-63  | 100 |  |  |
|     |                              | strain CBS 109166 C11_contig_289                |      |                                              |                |              |        |     |  |  |
|     | Calonectria pseudonaviculata | Calonectria pseudonaviculata                    | 666  | Rhizoctonia solani ourmia-like virus 1 RNA 1 | ALD89131.1     | 90/221(41%)  | 3e-29  | 96  |  |  |
|     |                              | strain CBS 139394 CpsSB_contig_1142             |      |                                              |                |              |        |     |  |  |
| GSS | Symbiodinium minutum         | SYMB2F fosmid                                   | 1163 | Beihai narna-like virus 7                    | APG77081.1     | 120/294(41%) | 1e-50  | 74  |  |  |
|     |                              | Symbiodinium minutum genomic clone SYB2F-146E05 |      |                                              |                |              |        |     |  |  |
|     | marine RNA virus             | JP.418D.600-24 B.C.                             | 709  | Hubei narna-like virus 8                     | APG77202.1     | 95/194(49%)  | 2e-44  | 77  |  |  |

community    uncultured    marine    RNA    virus  
marine RNA virus                    community    uncultured  
                                                                                                 marine RNA virus genomic

---

Note: these similar sequences were collected by tblastn searches against the NCBI databases of non-mouse expressed sequence tags [EST] and transcriptome shotgun assembly [TSA]. Accessions with e-value less than e-5 were collected.

### Genome sequence of MOLV4

>MOLV4

```
AGGGGGTACACAGGCTAGCCTGGTCCTCGGGGTTTGTGCTCCACCTGCGCATATCTCGTGGTTTGTGCTCCTACGATTGGAGTGTGACACCGTAACAGGCAGTGTGACGGGTCTGGTTTCCGGGCATCACCCGGTGGAAAAGG  
GGTGTGGGGCCTTGCCTGTAATACAGGAGAAAGGTCTGTCCCGAAGAGAGAAGGTAAAACGCTAATCAGGCGTGGTCCGCGACTGTGCTCGCGCGCGCGGATCAGACCCGGGAGTAAGTGTCCCGGTGCGGATCTCGG  
AGGGTCGGGTGGACATGGTGGTCCCCATCCCTTATCGGCACAAAGATCGTGAAGACCGGGTCCGGGGACCCTGACGTCTATAAAAGCGAATTGAAGTCCAACAAAAGGAATCGAAAATATGGTGACAAATTGCCAATTAAGT  
TGTATTGGCTACCATACGGAGCTCCCTCCGTTTTTCGTTCCCTCTCGGCCAGTGTGAGTTCTTTCTTTTAAACAAACGACTGCGTCTCGAAGTCAGGGCGGGTGCCTGATTGCTTTTCACGTTAACCGACAATCGCCCCCTGGG  
ACCGGCCCCAGGATAACAAAACCGGTTGGTCCGAACCGTGACATGGACTGTAAAAATGTCCGCGCAATGGGAGGGTTCGCGGAGCCGCTGTGGCGCTTCTGAGCAGCGACCAGGAAATGGAGAGGGTCCGTCCCTTACCTCCACG  
GATTTCGTTGCGGGGATCTCCGTCCCGCAATCCGTCAATGCTTCCCGGATCAACTACCTGTTGTGAAGGAATTAAGTATTAACATCTCAAAGCTAGAAATAGCACCGTCAAGTACTGCGAGCCGGCGATGTTACATAGACTTA  
ATGAGTGGCTAAAAGAGAGATACATCCCACTTGATCCGGTGGATCATGCCACATTGCCCTTTTCAAAGGGCCCTCGCGGTGAATGTGGACATGGGATGGAATAAAAAGAAAGTACCCGTATATCCCGACGGGTCACTCGACGCTC  
AACTCCCTCGTGAGAGGGAGGATCCTGGAATGAGGAGGGTTACAGCCCCTACTGCCGCGCGCTACTGTCCACAGTAACGGGAAGCCAGGATCGTCACAATGTACTCAGGACGGAATCCGAGGTCTGAGCCCCTCCACCA  
GTCGCTGTACGCGAGTTTGAAGGAAGGGATGGCTTCTTGTTCGGTAGCCCCACCGATGAGAGCGTAGGATGGCTAGGCAGCGGGCGGCTTACGTATCTGTGACTACAAGTCGGCCACAGATAACATACGTGCCGAGTACGTTT  
GCGCTGTATAGACGTCTTAAGGCTCGGGCAGACCAGCTGACAGAAGAGGAGTCTCGTTGCCTTGATGTCGTCGGTGAACCTCAGGTTTGTGACTTACCGAGGACACTCCCGCCACGAGGGGACAACCAATGGGTAGTTTGTATG  
AGCTTCCCTTGTCTTTGTTGATAAACAACAGTTGTCGACCTGCAGTGTGATCTGGCAGAGTCGGGGAAAAATCACCTGGGAGCAATCCGGGTACATCGCTGTCTCATCAACGGCGATGACTTGTCTTATCGCGAGTTTGA  
CAGCTCTCGCGATATACTTCCGGTATCCTCCGCCATGGGACTTTGGTTCGGTCTCGTGGTCAACGAGGAGAAAAACGATGGTATCGGCCACCGACGCGGAGATCAACTCCACTGTGTTTCGTCGGGGTTCGAAAGCAAAAAGAAACGA  
ATGTGAAGGTGGTATGTTGGTCCAGTATGTAACGGATCCCATCGGTTTTATTGCCGATTCCGTTGTAAGACATCCTCGTTCCGCAAGCTCCTCGGGAGATGGGAAATCCCGATTAGGAAGGCCCGCGAAGGTCCAGGGTCCC  
TTGCCTCCGTTCTTTTAAAGCTCTGTTTAAAGAGAAAACGGATCAGGGACGCGCTGACATGGATCCCTCCTCCACCGCAAAATCACCGAACCCCTTCCCGTTGTAGTCAAGCCTGCAGACTACTGTTTAACTCGCGAGGAAGA  
GGTGCCTACATCTCAGAACGAGTAGCCAGGCTGAAGTCGTCGGGTACAAGCCTCGGAAACCTGCGAGGTGCTCGACCGGACGGAAGAAAGGTGCAATATCCAGTATGACTAAGGAAAGAAAAACAGCCGCAGAAGAACGGA  
TACTCGCGTCTTGGCCGACGTTGGAAGGAGAAACAGTTTCAAAGCTGATCGGACAATCCGACCCTTCGTACCCCTCTCTGGGGTACGCAGACTGGTGCCAGGAGTGCTATGAGCATAGCCACTCCATGATCCAGTGCTTA  
ACTGCGAGGATAAGGAGACAAAAGAGTGTGGGAGTAGTCCGGACTACGGACGAGGTGACTGCGGTTCGGGAAACCGACTCCGGTTCGGGAGGGTTTTGGCGATTACTGTTCACTTACCAGCAGTGATTAGTCTTGGCCGACGCG  
CCTAGTACATGGAGC
```
